# Supplementary material for: Evaluation of ensemble precipitation forecasts generated through postprocessing in a Canadian catchment
Source: Copernicus journal article supplement (doi:10.5194/hess-2017-331), 2017-08-07
Supplement: Supplementary file [file hess-2017-331-AC1-supplement.zip]

# Supplementary Figures

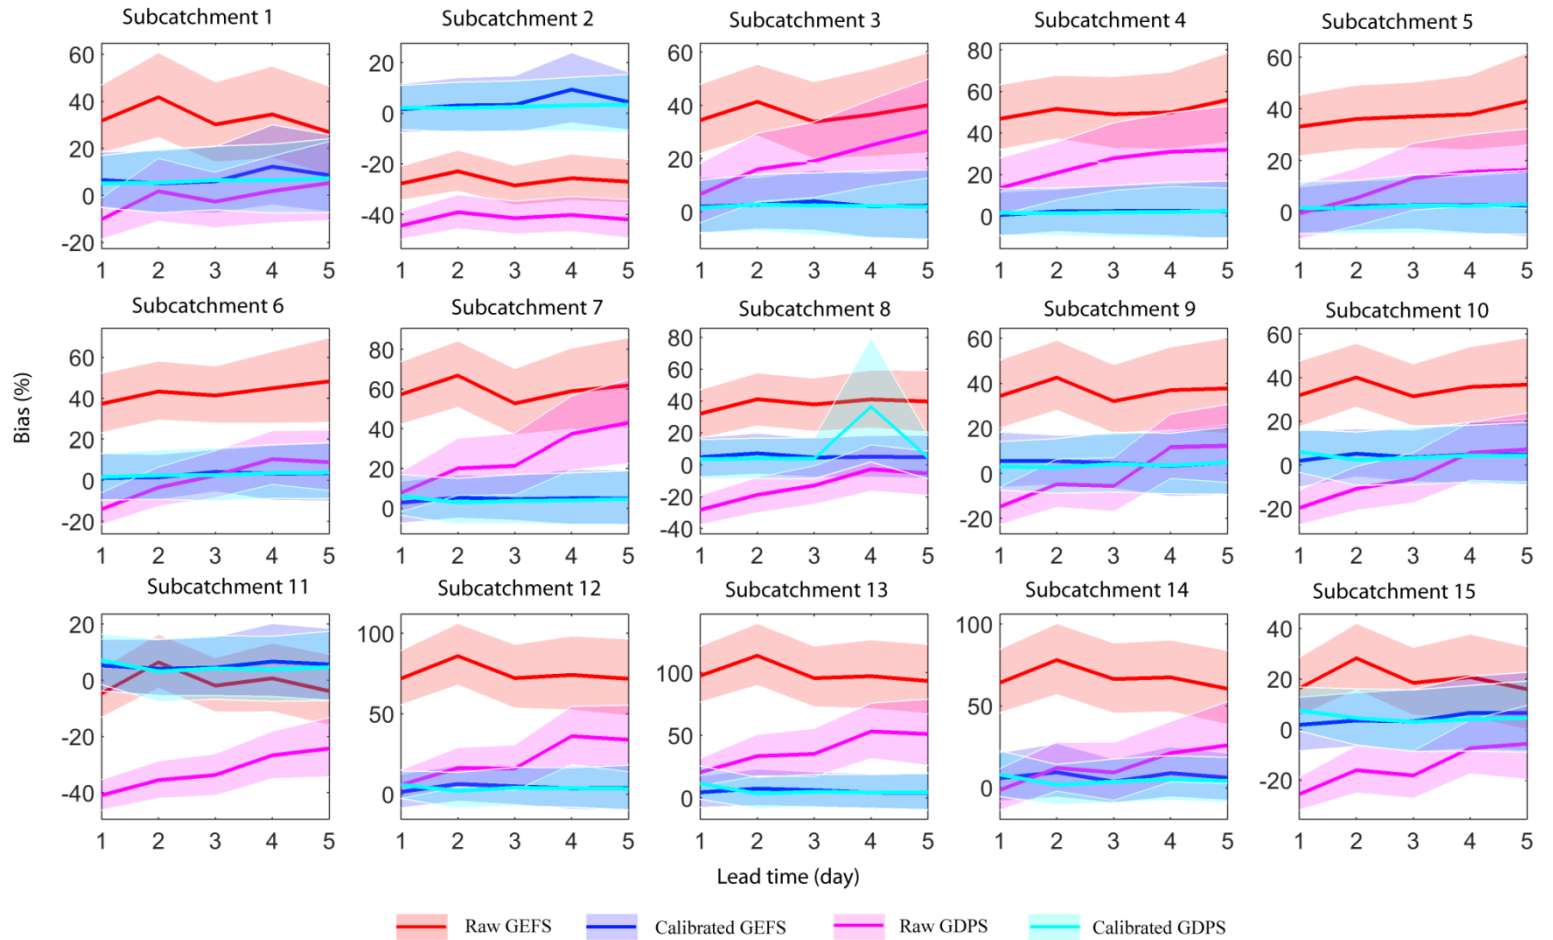

**Figure SF-1(a):** Subcatchment-averaged bias (%) in the raw QPFs and calibrated QPFs for individual daily forecasts as a function of lead-time for all subcatchments. The shaded region represents 5% and 95% confidence intervals generated using a bootstrap approach. Note the different scales on the vertical axes.

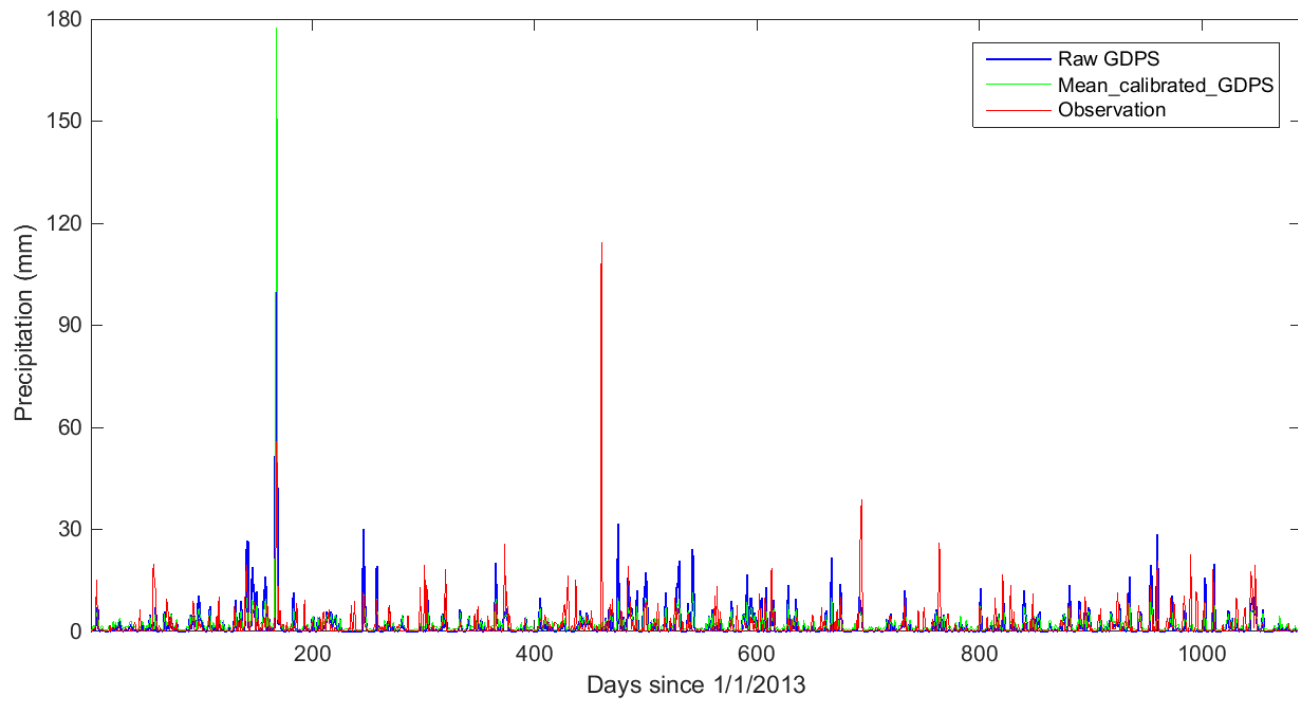

**Figure SF-1(b): Comparison of weighted-area raw GDPS with subcatchment-averaged observation for the year 2013 to 2015 in subcatchment 8 for lead time of 4 days.**

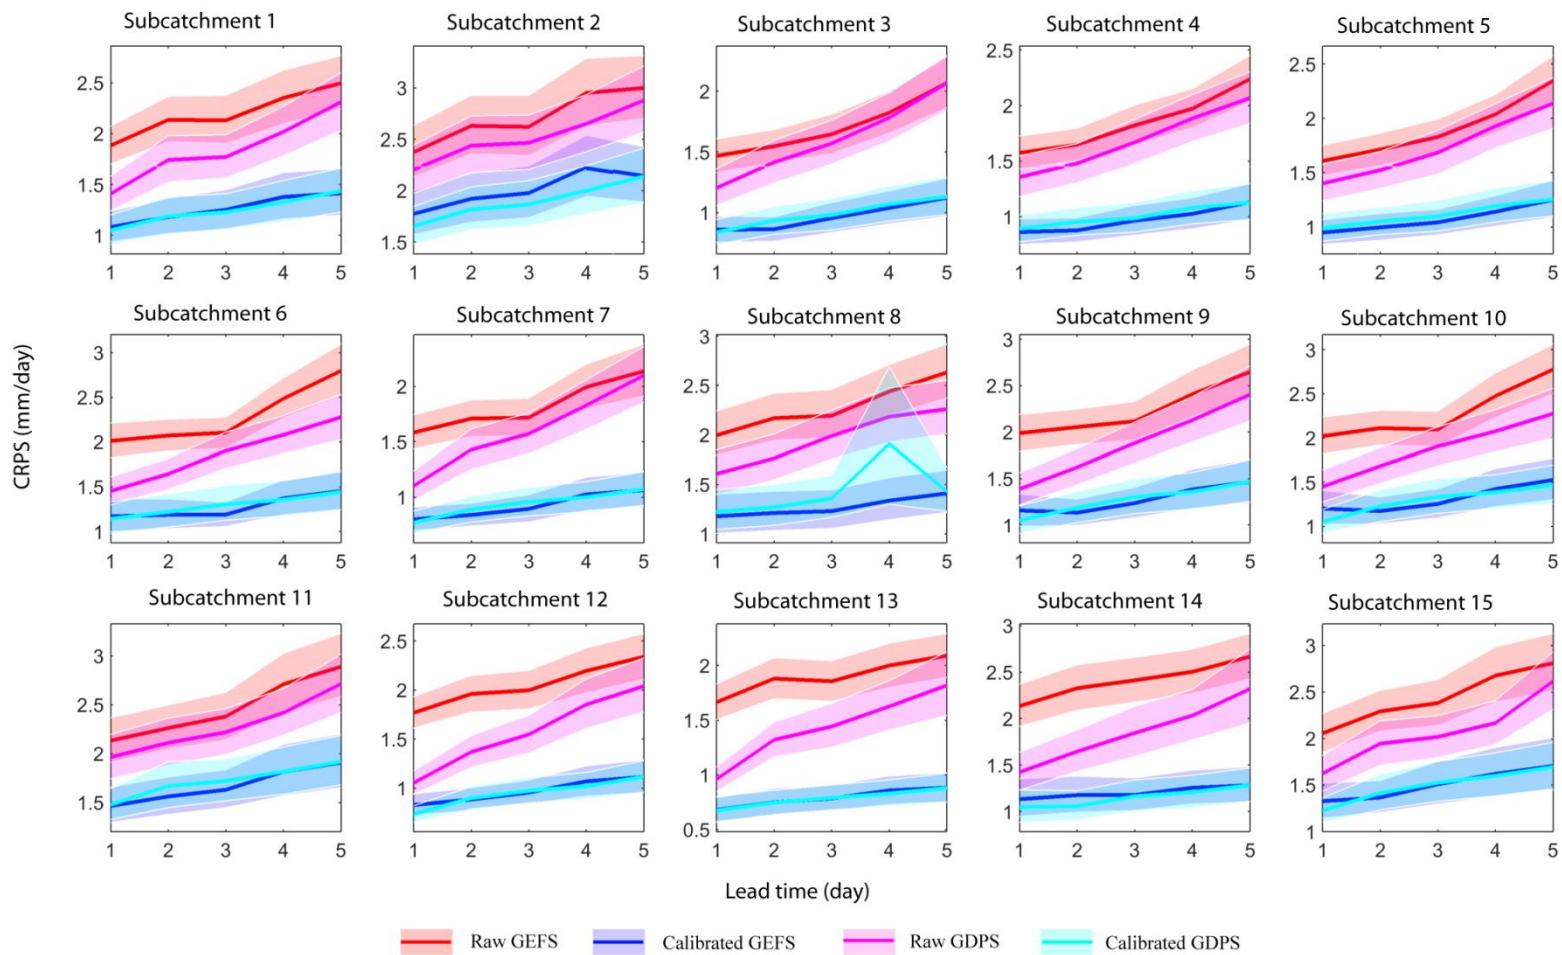

**Figure SF-1(c): Subcatchment-averaged CRPS (mm/day) in the raw QPFs and calibrated QPFs for daily precipitation as a function of lead-time for all subcatchments. The shaded region represents 5% and 95% confidence intervals generated using a bootstrap approach. Note the different scales on the vertical axes.**

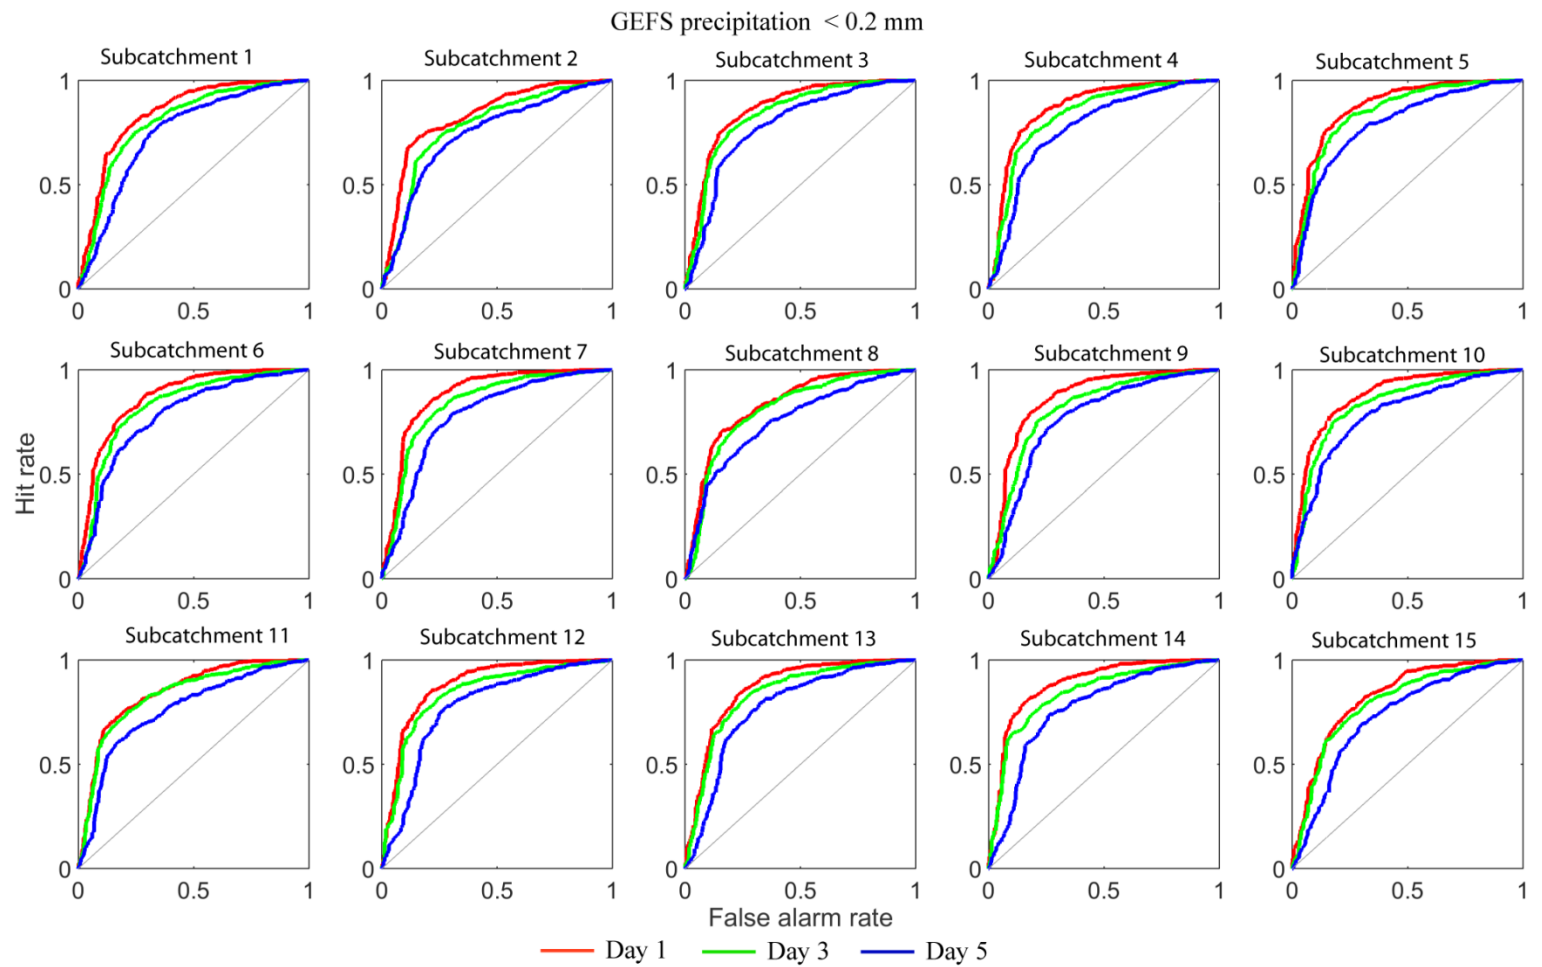

**Figure SF-2(a): Relative operating characteristic (ROC) curve at lead times of 1, 3, and 5 days for calibrated GEFS for events of precipitation less than 0.2 mm for all subcatchments. In the calculation of ROC, the daily data from 2013 to 2015 are used.**

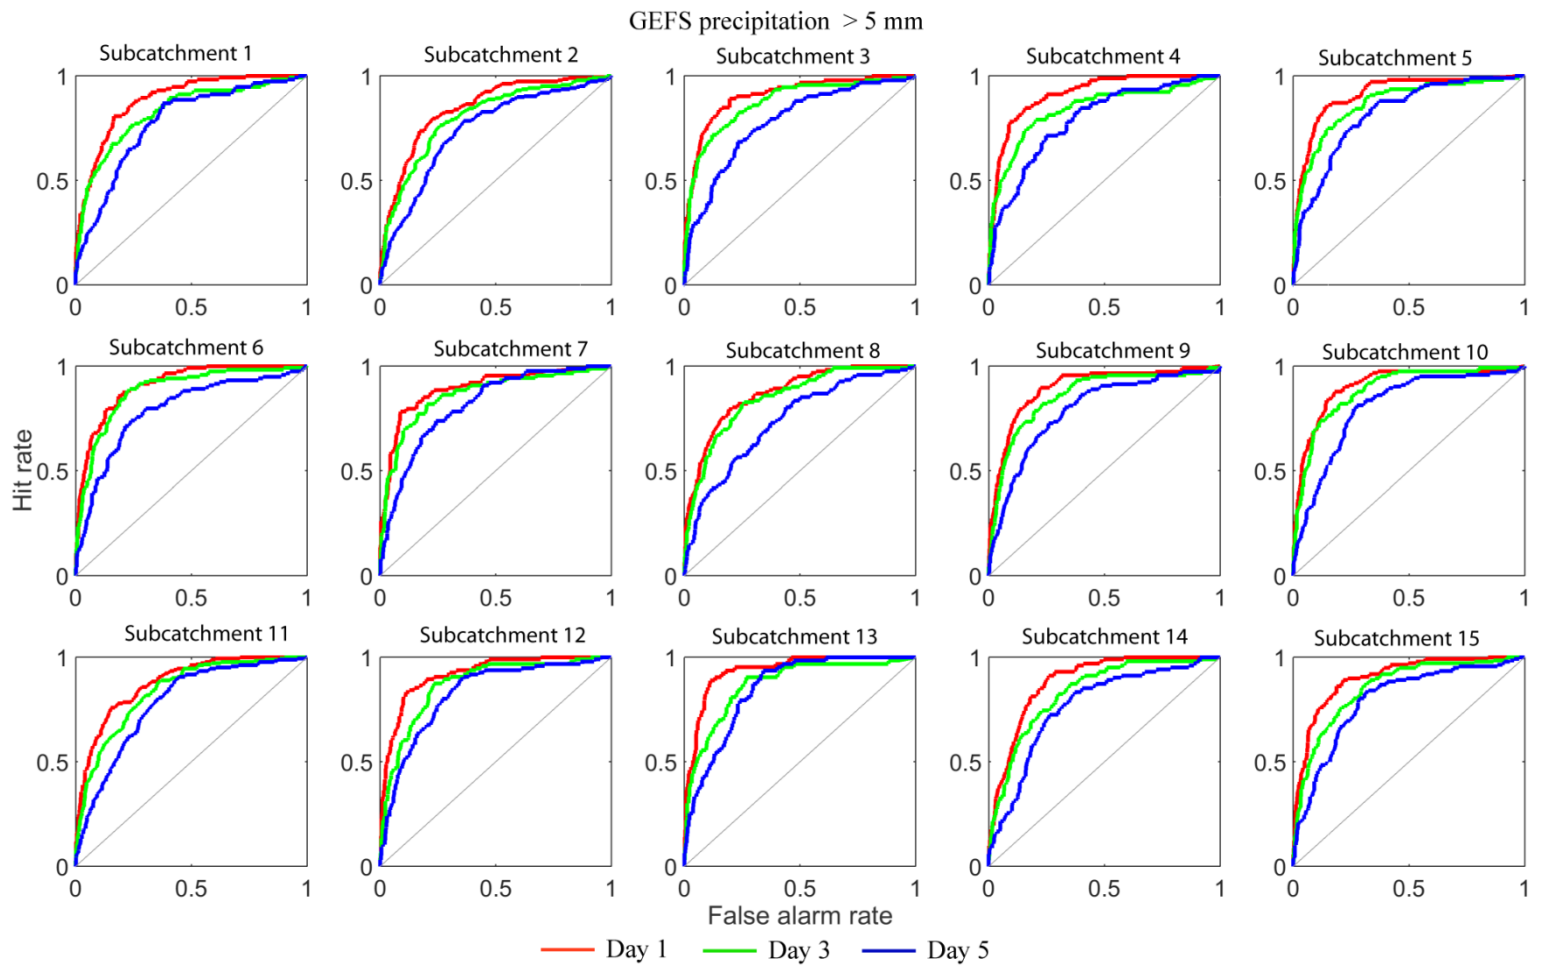

**Figure SF-2(b): Relative operating characteristic (ROC) curve at lead times of 1, 3, and 5 days for calibrated GEFS for events of precipitation greater than 5 mm for all subcatchments. In the calculation of ROC, the daily data from 2013 to 2015 are used.**

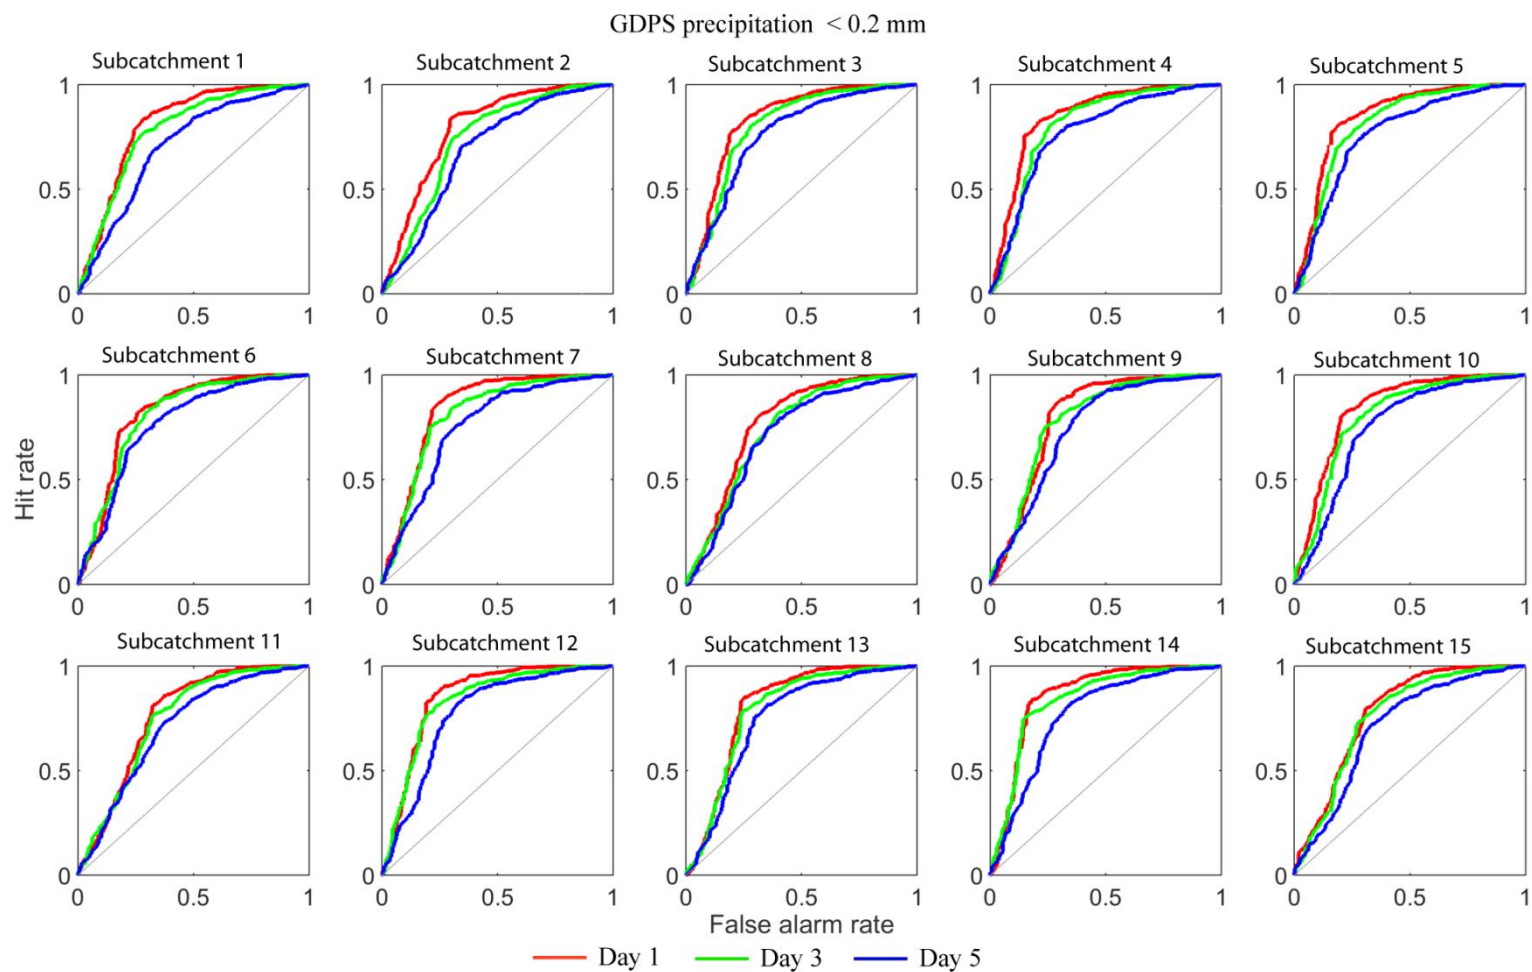

**Figure SF-2(c): Relative operating characteristic (ROC) curve at lead times of 1, 3, and 5 days for calibrated GDPS for events of precipitation less than 0.2 mm for all subcatchments. In the calculation of ROC, the daily data from 2013 to 2015 are used.**

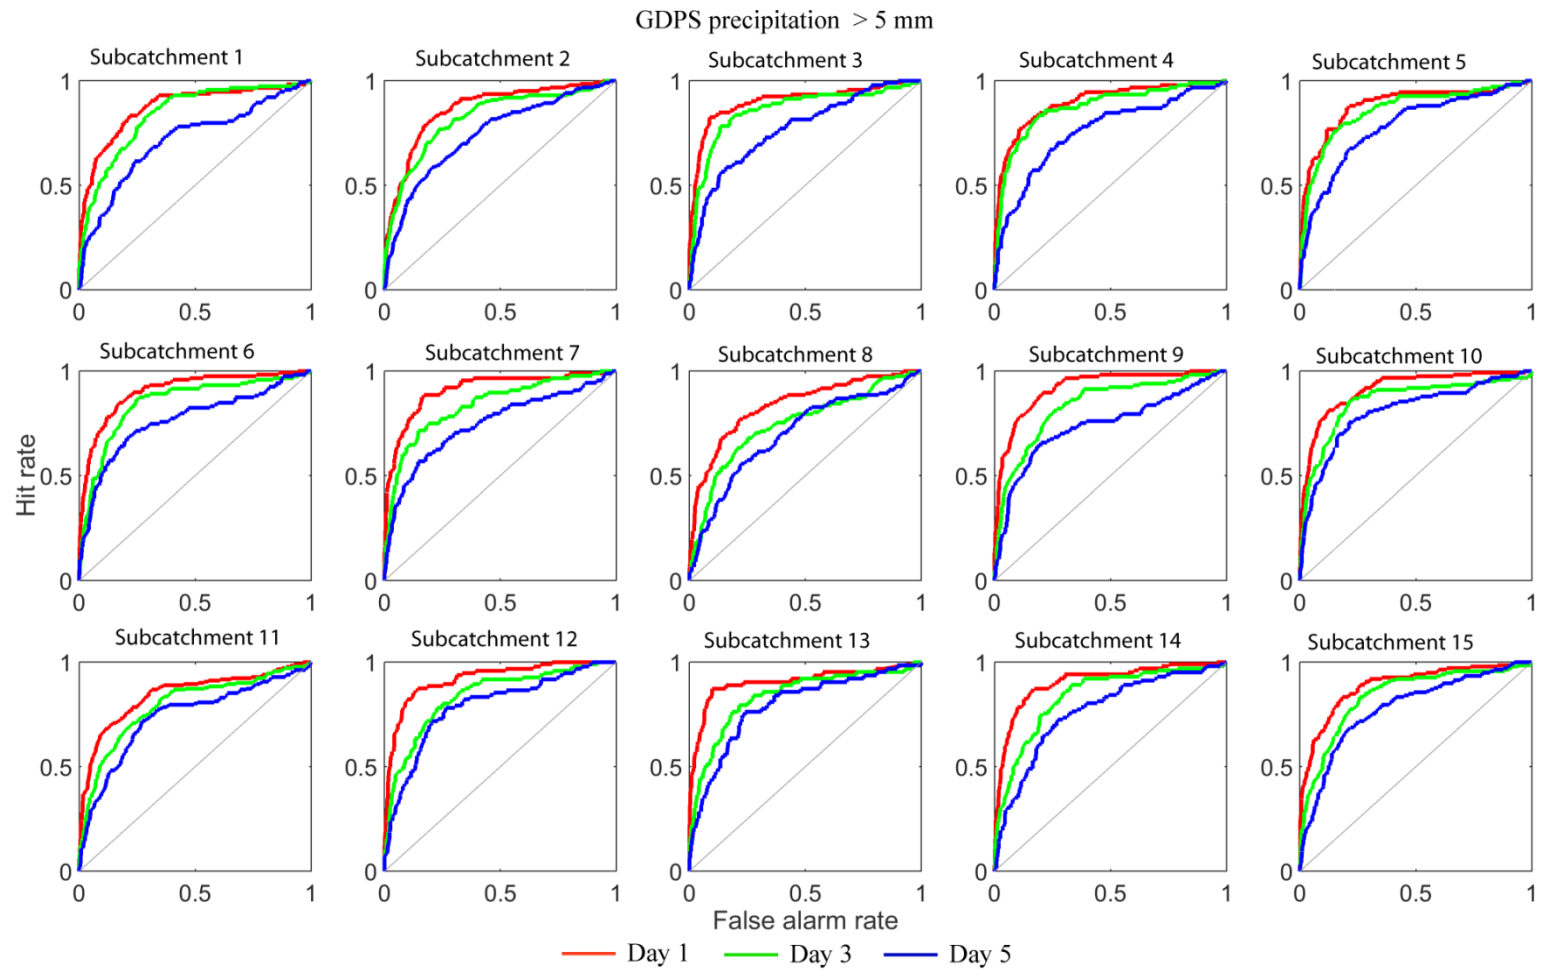

**Figure SF-2(d): Relative operating characteristic (ROC) curve at lead times of 1, 3, and 5 days for calibrated GDPS for events of precipitation greater than 5 mm for all subcatchments. In the calculation of ROC, the daily data from 2013 to 2015 are used.**

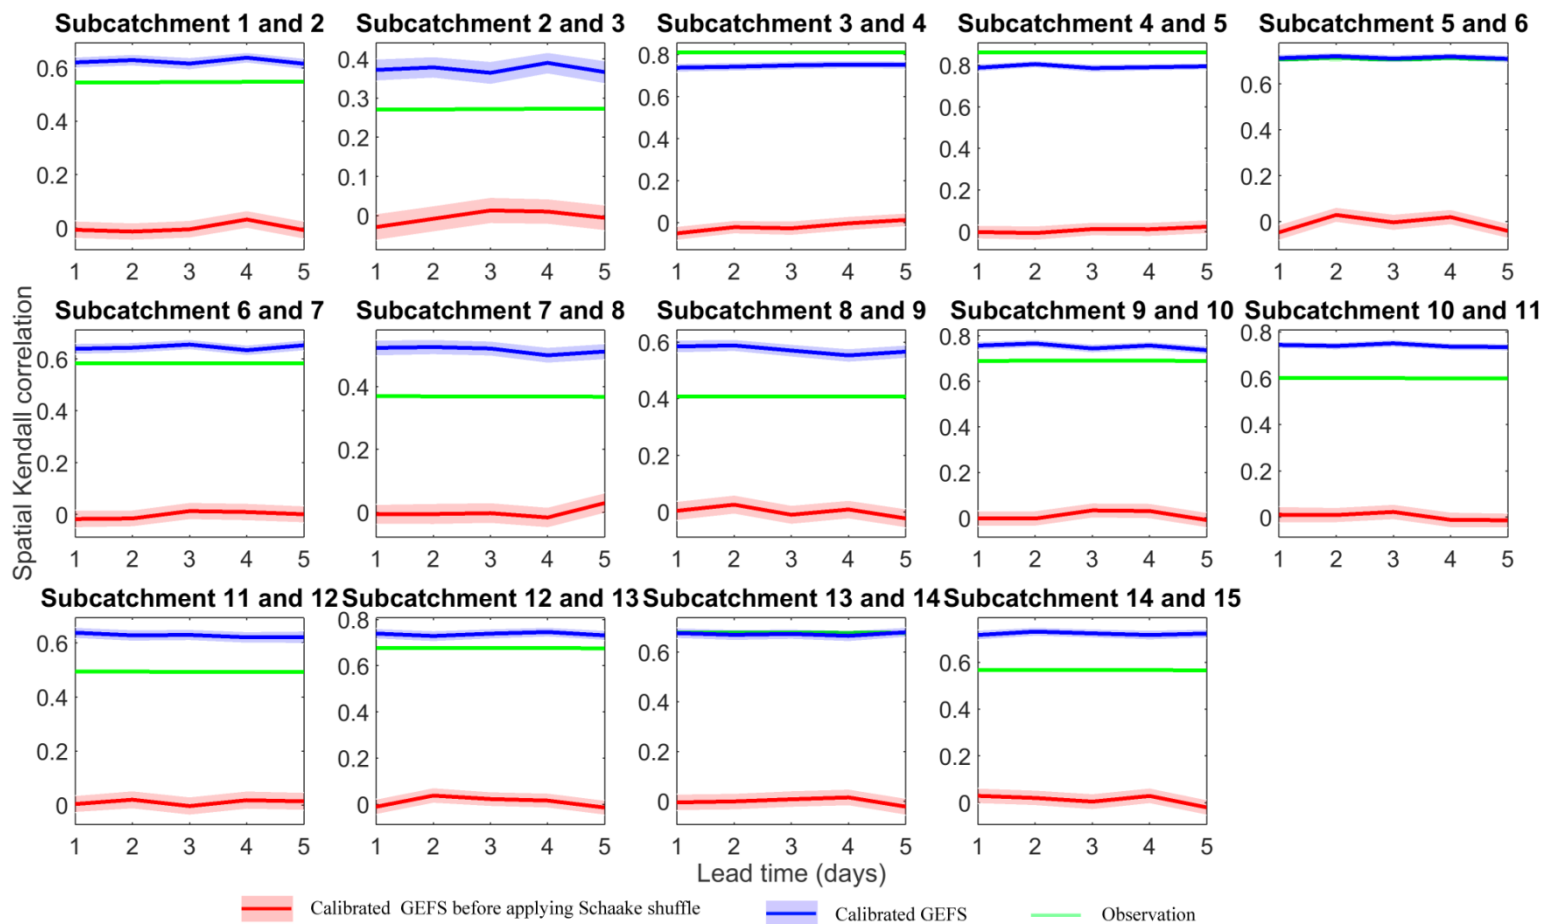

**Figure SF-3a: Spatial Kendall correlation coefficients for the calibrated GEFS before and after applying the Schaafe shuffle and for observation between different subcatchments.**



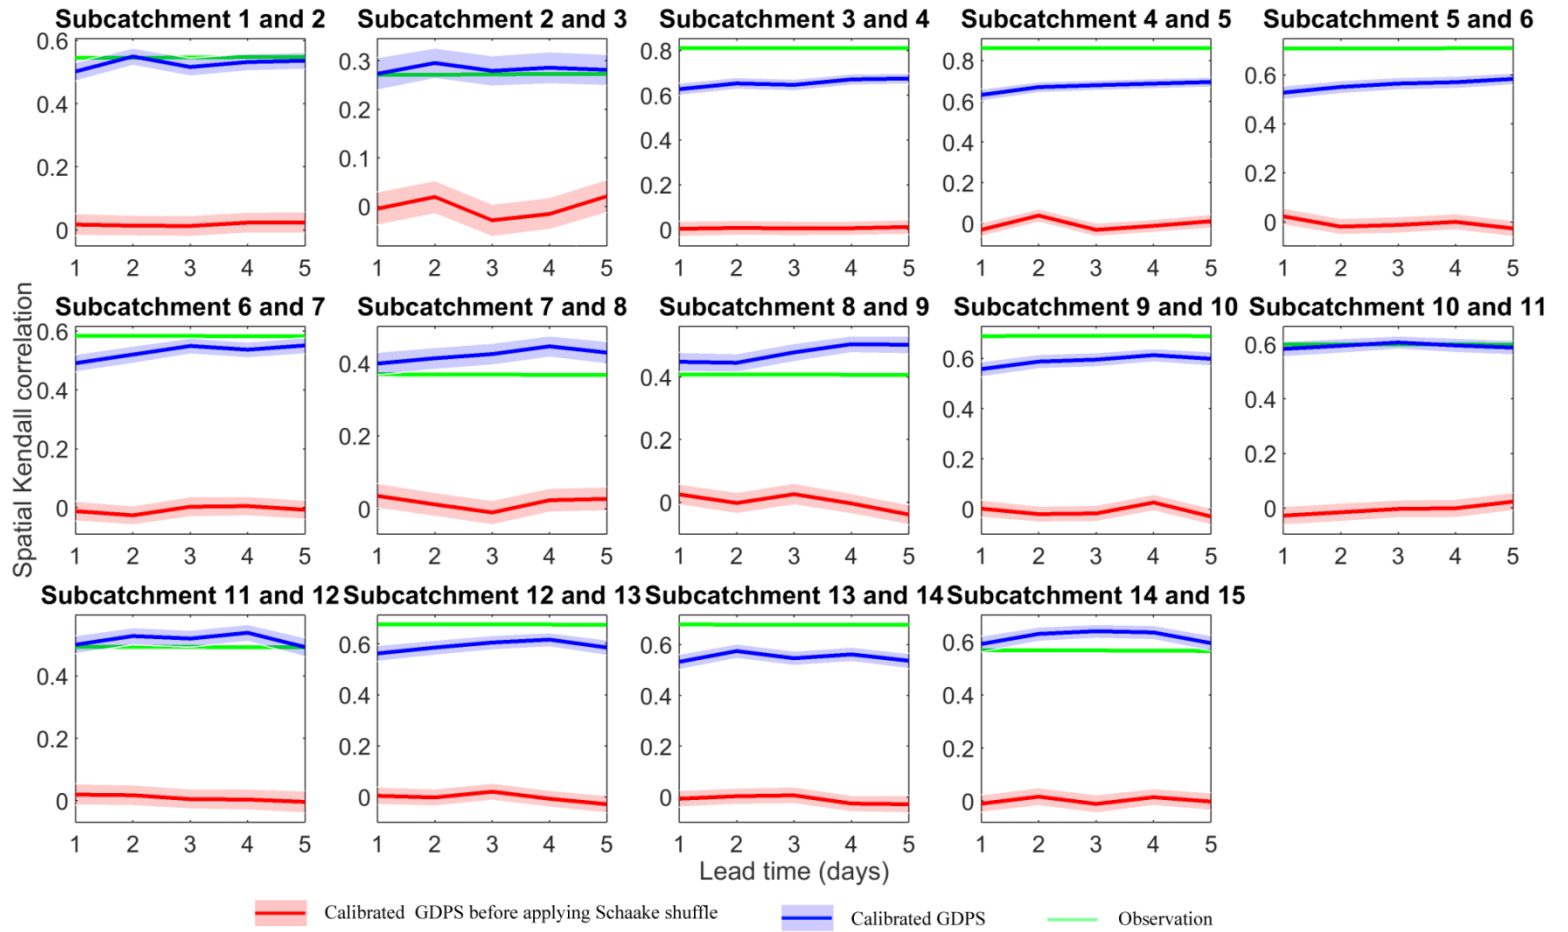

**Figure SF-3b: Spatial Kendall correlation coefficients for the calibrated GDPS before and after applying the Schaake shuffle and for observation between different subcatchments.**

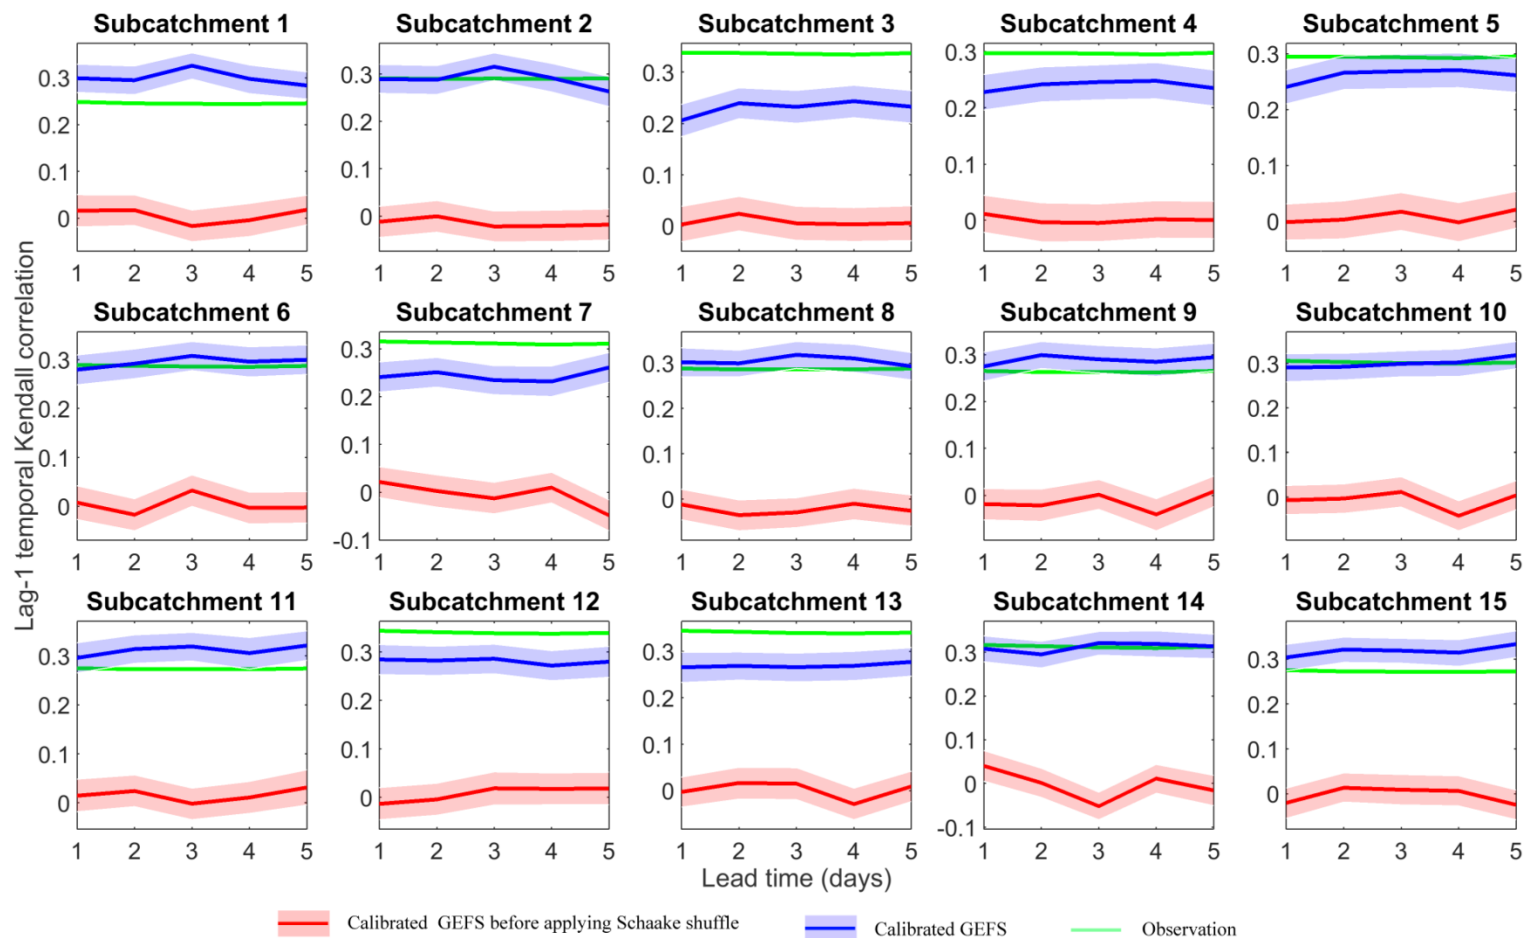

**Figure SF-4a: Lag-1 temporal Kendall correlation coefficients for the calibrated GEFS before and after applying the Schaafe shuffle and for observation.**

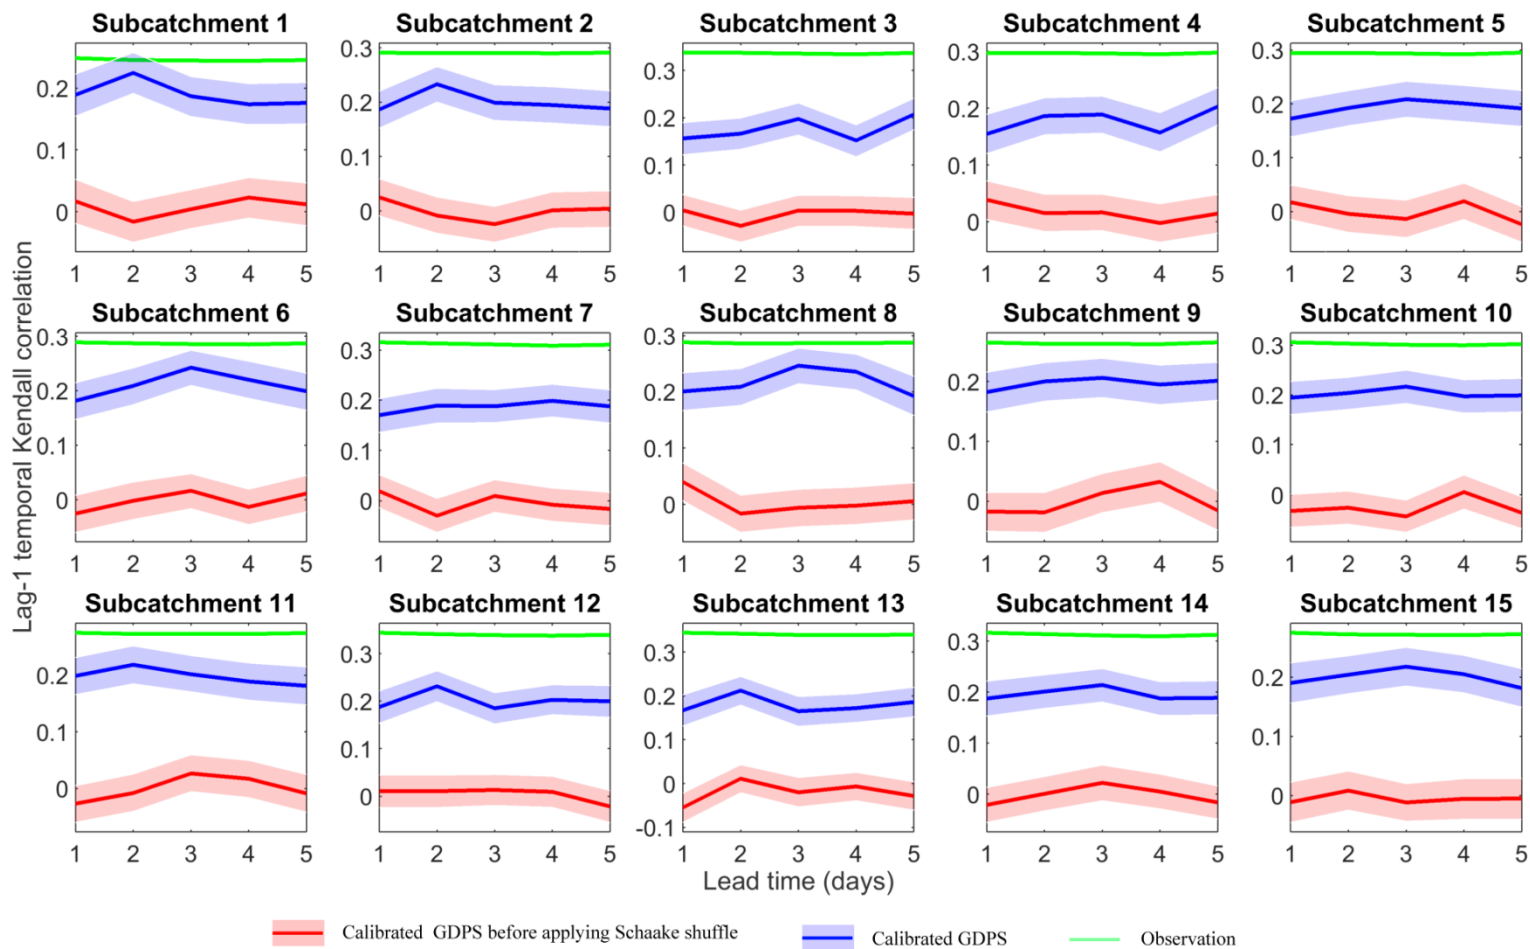

**Figure SF-4b: Lag-1 temporal Kendall correlation coefficients for the calibrated GDPS before and after applying the Schaake shuffle and for observation.**
